# Supplementary figures and images for: Machine learning-assisted profiling of a kinked ladder polymer structure using scattering
Source: Royal Society of Chemistry journal article supplement (doi:10.1039/d5dd00051c), 2025-01-01

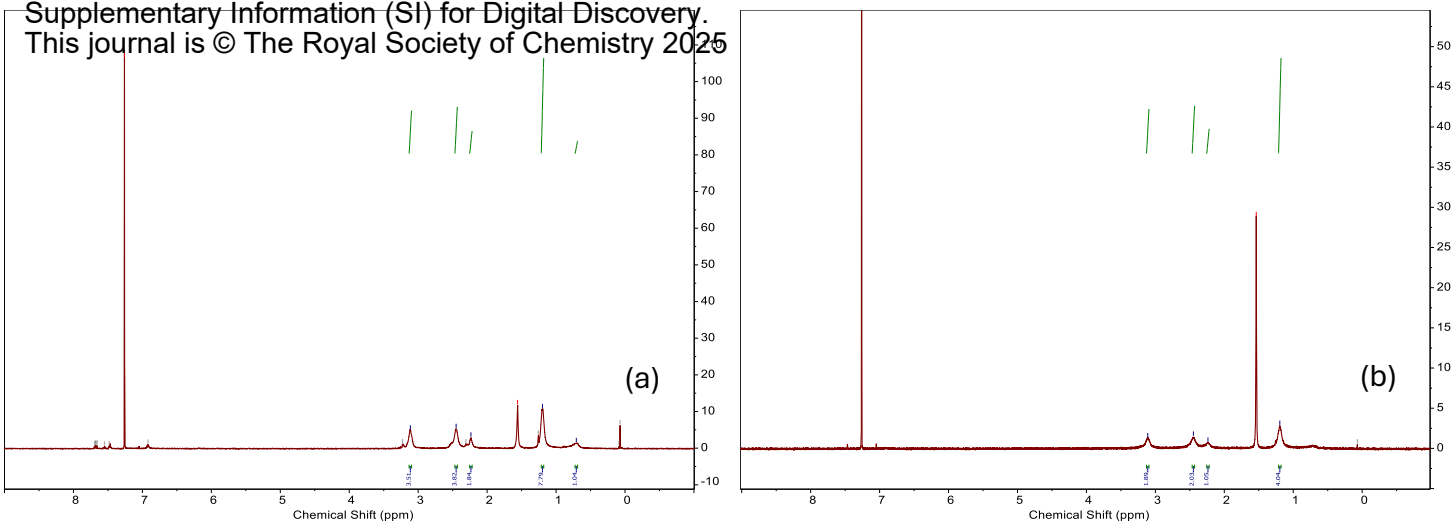

Supplement: d5dd00051c2.pdf [file d5dd00051c2.pdf]
